# Supplementary material
Source: PubMed Central journal article supplement (PMC2865677)

**Supplementary Table 1.** Summary results for top 22 markers reaching a statistical significance of  $P < 5.0 \times 10^{-6}$  in the discovery phase.

| Marker <sup>a</sup> | Allele<br>Major/Minor (Risk) | Chromosome | MAF      |       | P-value <sup>b</sup>   | OR (95% CI)      |                               |                         |
|---------------------|------------------------------|------------|----------|-------|------------------------|------------------|-------------------------------|-------------------------|
|                     |                              |            | Controls | Cases |                        | Per allele       | Heterozygote <sup>c</sup>     | Homozygote <sup>d</sup> |
| rs4474514           | A/G (A)                      | 12         | 0.198    | 0.089 | $3.54 \times 10^{-10}$ | 0.41 (0.30-0.56) | 0.43 (0.30-0.61)              | 0.12 (0.03-0.50)        |
| rs3782181           | T/G (T)                      | 12         | 0.202    | 0.094 | $8.38 \times 10^{-10}$ | 0.42 (0.31-0.57) | 0.42 (0.30-0.60)              | 0.18 (0.05-0.58)        |
| rs3782179           | A/G (A)                      | 12         | 0.199    | 0.092 | $1.35 \times 10^{-9}$  | 0.42 (0.31-0.58) | 0.43 (0.30-0.60)              | 0.18 (0.06-0.58)        |
| rs11104952          | C/A (C)                      | 12         | 0.198    | 0.092 | $1.90 \times 10^{-9}$  | 0.43 (0.31-0.58) | 0.43 (0.30-0.61)              | 0.18 (0.06-0.58)        |
| rs1472899           | T/C (T)                      | 12         | 0.199    | 0.095 | $3.09 \times 10^{-9}$  | 0.43 (0.32-0.58) | 0.43 (0.30-0.60)              | 0.19 (0.06-0.63)        |
| rs1352947           | A/G (A)                      | 12         | 0.183    | 0.083 | $4.24 \times 10^{-9}$  | 0.42 (0.30-0.58) | 0.41 (0.28-0.59)              | 0.22 (0.07-0.70)        |
| rs995030            | C/T (C)                      | 12         | 0.172    | 0.076 | $7.47 \times 10^{-9}$  | 0.42 (0.30-0.58) | 0.43 (0.29-0.62)              | 0.15 (0.04-0.61)        |
| rs3770112           | C/T (T)                      | 2          | 0.314    | 0.450 | $4.93 \times 10^{-8}$  | 1.77 (1.44-2.18) | 2.70 (1.94-3.76)              | 2.62 (1.66-4.14)        |
| rs7486184           | C/T (C)                      | 12         | 0.192    | 0.103 | $4.56 \times 10^{-7}$  | 0.50 (0.37-0.67) | 0.52 (0.37-0.72)              | 0.20 (0.06-0.65)        |
| rs2524594           | G/A (G)                      | 23         | 0.170    | 0.055 | $8.91 \times 10^{-7}$  | 0.53 (0.40-0.71) | 0.28 <sup>e</sup> (0.16-0.50) |                         |
| rs1549383           | G/A (A)                      | 2          | 0.303    | 0.418 | $1.01 \times 10^{-6}$  | 1.65 (1.35-2.02) | 1.77 (1.32-2.39)              | 2.61 (1.71-4.00)        |
| rs6534637           | G/T (T)                      | 4          | 0.449    | 0.572 | $1.06 \times 10^{-6}$  | 1.73 (1.40-2.14) | 4.52 (2.85-7.16)              | 3.95 (2.36-6.62)        |
| rs7236484           | T/A (A)                      | 18         | 0.089    | 0.160 | $1.61 \times 10^{-6}$  | 1.96 (1.47-2.62) | 1.63 (1.17-2.27)              | 13.3 (3.61-48.7)        |
| rs6897876           | C/T (C)                      | 5          | 0.459    | 0.345 | $1.77 \times 10^{-6}$  | 0.63 (0.52-0.77) | 0.78 (0.58-1.04)              | 0.34 (0.21-0.53)        |
| rs3755353           | G/A (A)                      | 2          | 0.364    | 0.483 | $1.77 \times 10^{-6}$  | 1.79 (1.44-2.23) | 3.38 (2.35-4.86)              | 2.64 (1.59-4.37)        |
| rs7774545           | A/G (G)                      | 6          | 0.284    | 0.397 | $1.83 \times 10^{-6}$  | 1.66 (1.35-2.04) | 1.92 (1.42-2.60)              | 2.46 (1.56-3.89)        |
| rs6961928           | C/T (T)                      | 7          | 0.417    | 0.539 | $1.83 \times 10^{-6}$  | 1.74 (1.40-2.16) | 3.30 (2.20-4.95)              | 3.23 (1.99-5.24)        |
| rs12521013          | G/T (G)                      | 5          | 0.478    | 0.363 | $1.99 \times 10^{-6}$  | 0.63 (0.52-0.76) | 0.82 (0.61-1.10)              | 0.33 (0.21-0.51)        |
| rs26939101          | A/C (A)                      | 12         | 0.160    | 0.083 | $2.16 \times 10^{-6}$  | 0.48 (0.34-0.66) | 0.48 (0.33-0.69)              | 0.22 (0.05-0.95)        |
| rs4324715           | T/C (T)                      | 5          | 0.514    | 0.398 | $2.72 \times 10^{-6}$  | 0.63 (0.52-0.77) | 0.89 (0.65-1.21)              | 0.34 (0.22-0.53)        |
| rs2965606           | T/A (A)                      | 7          | 0.265    | 0.373 | $4.78 \times 10^{-6}$  | 1.61 (1.31-1.98) | 1.64 (1.22-2.22)              | 2.55 (1.63-4.00)        |
| rs17031166          | C/G (G)                      | 2          | 0.300    | 0.405 | $4.98 \times 10^{-6}$  | 1.60 (1.31-1.96) | 1.67 (1.24-2.24)              | 2.49 (1.62-3.83)        |

<sup>a</sup>dbSNP rsnumber. <sup>b</sup>Difference in allele frequency determined by Fisher's Exact test. <sup>c</sup>OR for heterozygous carriage of minor allele compared to homozygous carriage of major allele. <sup>d</sup>OR for homozygous carriage of minor allele compared to homozygous carriage of major allele. <sup>e</sup>OR for hemizygous carriage of the minor allele compared to carriage of the major allele.

**Supplemental Figure 1.** Quantile-quantile plot of chi-squared test statistics for testing differences in the observed versus expected SNP allele frequencies for the 611,254 markers meeting quality control criteria.

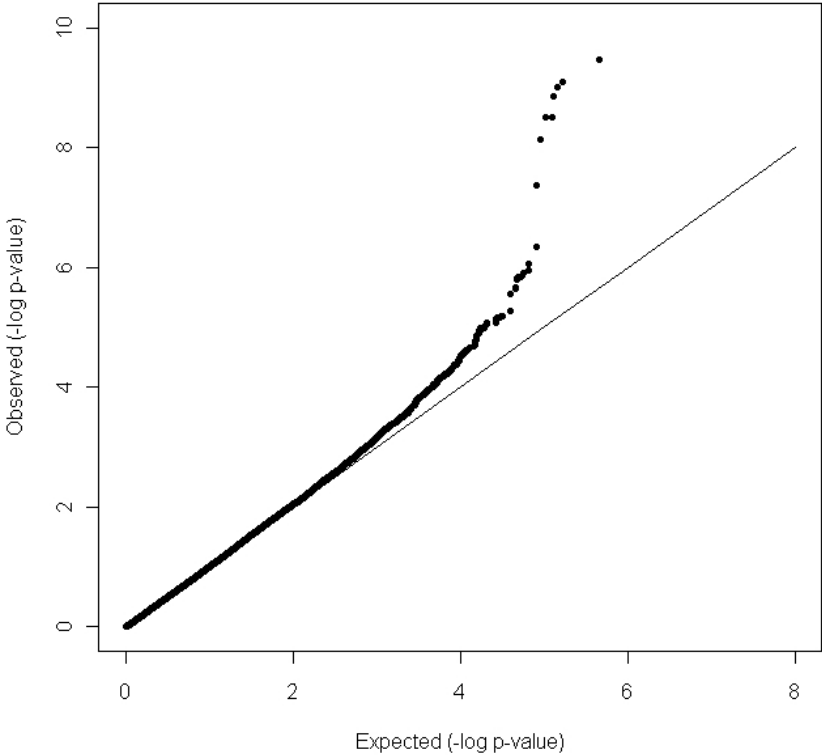

**Supplemental Figure 2.** Signal plot for chromosome 12.  
Red line indicates genome wide significance of  $P < 5.0 \times 10^{-8}$ ; green line indicates genome-wide significance of  $P < 5.0 \times 10^{-6}$ .

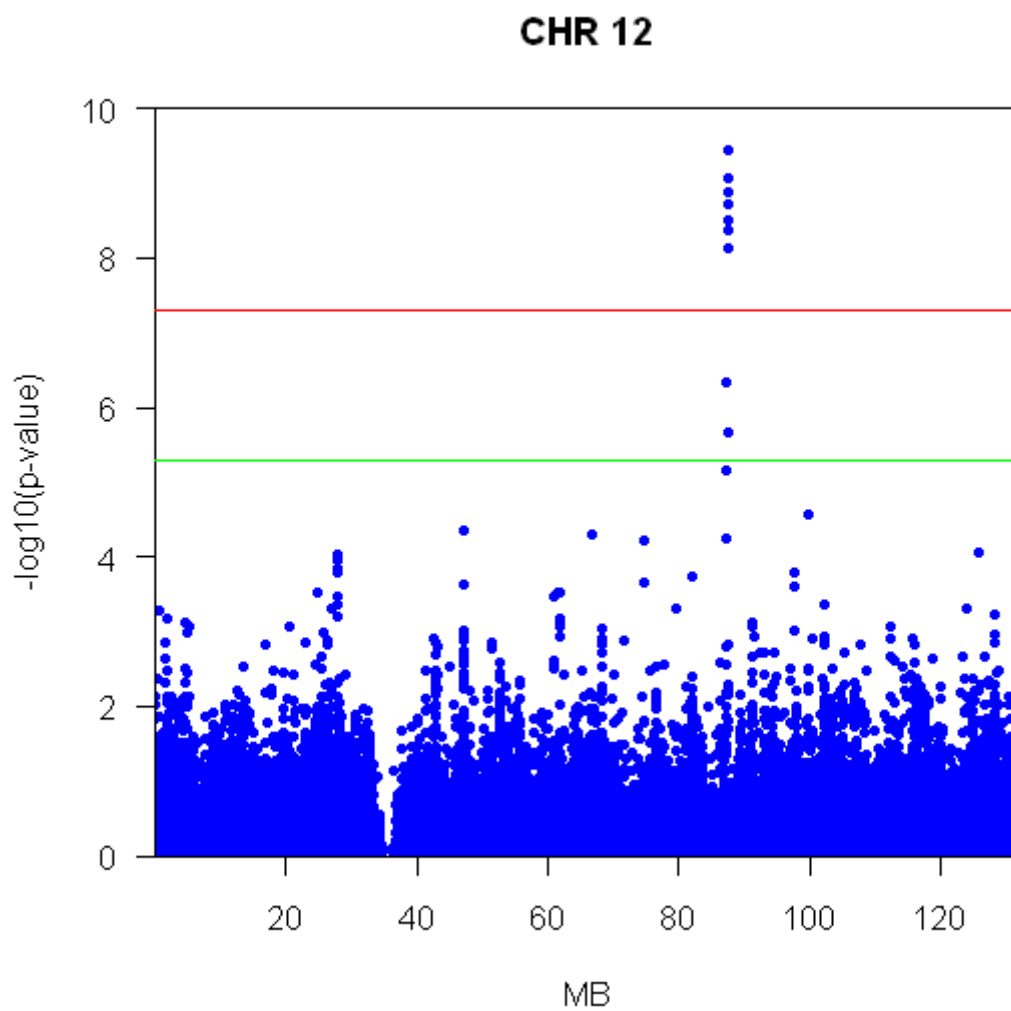

**Supplemental Figure 3a.** Signal plot for chromosome 2. Red line indicates genome wide significance of  $P < 5.0 \times 10^{-8}$ ; green line indicates genome-wide significance of  $P < 5.0 \times 10^{-6}$ .

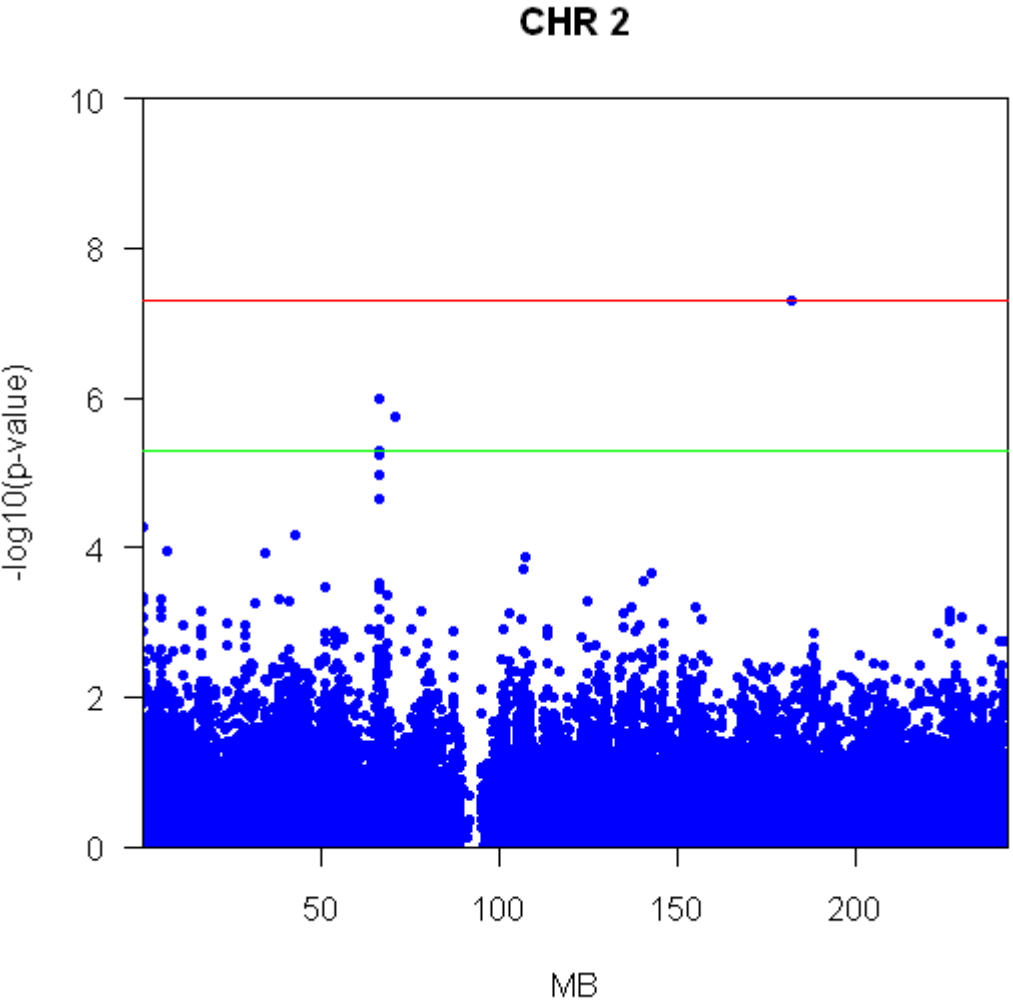

**Supplemental Figure 3b.** Imputed results for the region  $\pm 10\text{MB}$  from rs3770112 (indicated with an arrow) on chromosome 2 using data from the discovery phase. Marker associations for the discovery phase were determined using PLINK, and the  $-\log_{10}$  of the  $P$  values are shown in blue. Imputed marker associations were determined using SNPTTEST, and the  $-\log_{10}$  of the  $P$  values are shown in red. The correlation of  $-\log_{10}$  of the  $P$  values determined from PLINK and SNPTTEST for the common set of markers is 0.94.

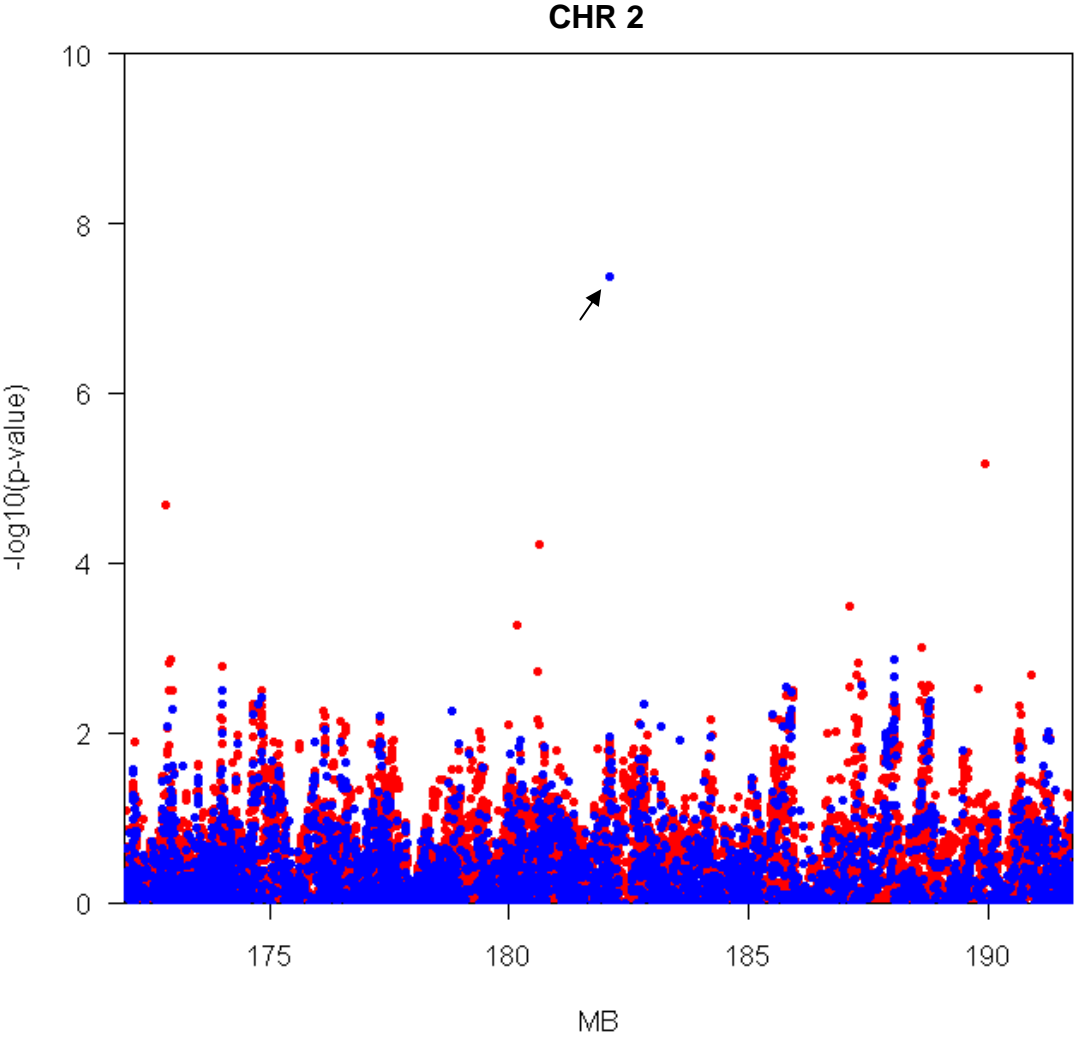

**Supplemental Figure 4.** Signal plot for chromosome 5. Red line indicates genome wide significance of  $P < 5.0 \times 10^{-8}$ ; green line indicates genome-wide significance of  $P < 5.0 \times 10^{-6}$ .

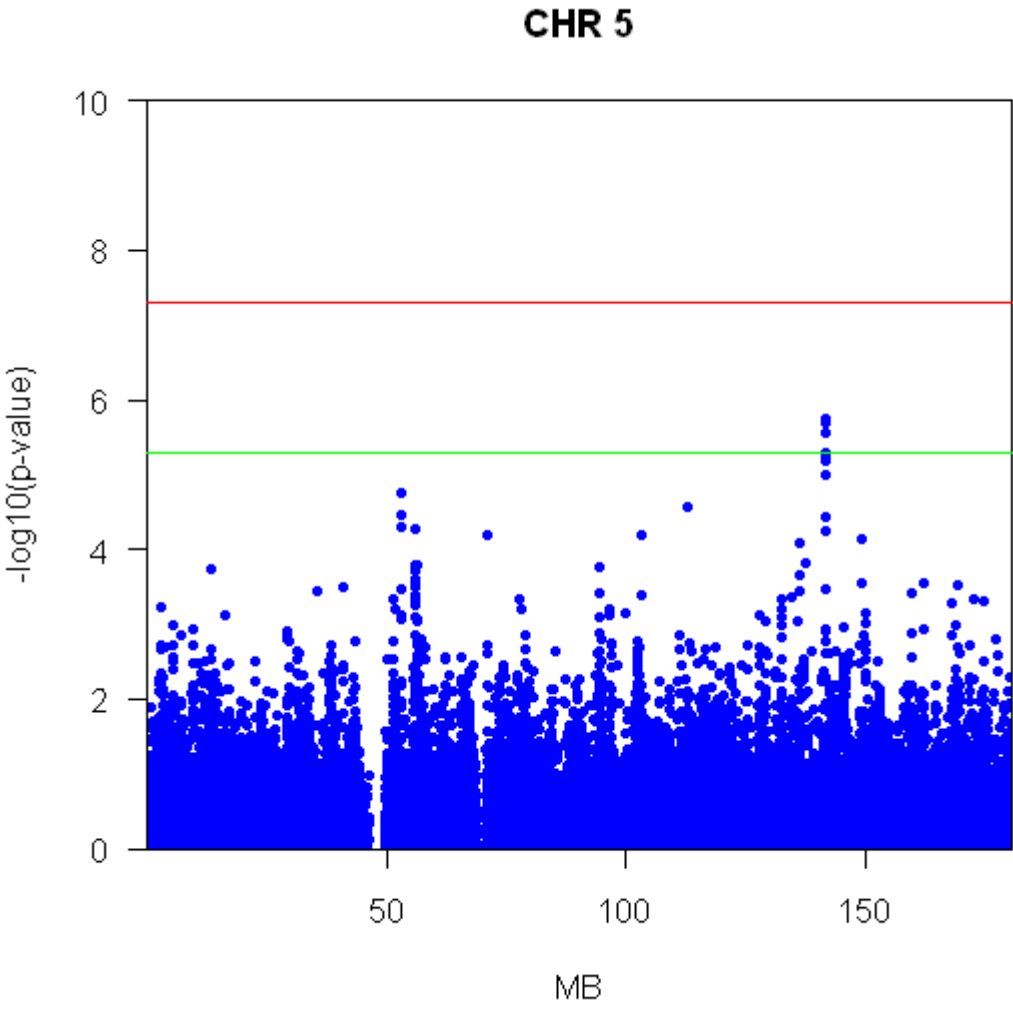

Supplement: NIHMS199209-supplement-Supplemental_Data.pdf [file NIHMS199209-supplement-Supplemental_Data.pdf]
